# Supplementary material for: In vivo cleavage specificity of Trypanosoma brucei editosome endonucleases
Source: PubMed Central journal article supplement — Nucleic Acids Res. 2017 Feb 21;45(8):4667–86. doi: 10.1093/nar/gkx116 (PMC5416837; doi:10.1093/nar/gkx116), 2017-02-21
Supplement: gkx116_supp.pdf [file gkx116_supp.pdf]

| Cell Line          | A6 Mapped Reads | COII Mapped Reads | CYb Mapped Reads | MURF2 Mapped Reads | ND7 Mapped Reads | Total Number of Mapped Reads | Unmapped Reads Excluded from analysis | Total Reads in Sample | % of Mapped Reads |
|--------------------|-----------------|-------------------|------------------|--------------------|------------------|------------------------------|---------------------------------------|-----------------------|-------------------|
| <b>427wt</b>       | 66,513          | 204,222           | 287,122          | 300,691            | 252,105          | 1,110,653                    | 353,574                               | 1,464,227             | 75.9              |
| <b>MGA</b>         | 29,984          | 106,824           | 142,268          | 169,248            | 136,959          | 585,283                      | 179,268                               | 764,551               | 76.6              |
| <b>KREN2 null</b>  | 220,567         | 631,677           | 863,295          | 1,076,317          | 692,339          | 3,484,195                    | 859,029                               | 4,343,224             | 80.2              |
| <b>KREN3 null</b>  | 57,028          | 81,897            | 172,841          | 153,394            | 85,745           | 550,905                      | 247,288                               | 798,193               | 69.0              |
| <b>KREN1 only</b>  | 136,160         | 228,734           | 299,137          | 418,238            | 289,855          | 1,372,124                    | 296,590                               | 1,668,714             | 82.2              |
| <b>KREN2 only</b>  | 133,800         | 417,694           | 468,452          | 527,111            | 455,485          | 2,002,542                    | 737,825                               | 2,740,367             | 73.1              |
| <b>KREN3 only</b>  | 141,482         | 262,820           | 414,425          | 401,130            | 308,994          | 1,528,851                    | 420,566                               | 1,949,417             | 78.4              |
| <b>Triple null</b> | 77,114          | 132,076           | 170,174          | 188,131            | 142,762          | 710,257                      | 199,634                               | 909,891               | 78.1              |
| <b>sum:</b>        | 862,648         | 2,065,944         | 2,817,714        | 3,234,260          | 2,364,244        | 11,344,810                   | 3,293,774                             | 14,638,584            | 77.5              |

**Table S1. Read counts mapped to target mitochondrial transcripts by cell line.** Total number of reads identified for target amplicons analysed by Illumina sequencing.

| Cell Line          | A6 Unique Reads | COII Unique Reads | CYb Unique Reads | MURF2 Unique Reads | ND7 Unique Reads |
|--------------------|-----------------|-------------------|------------------|--------------------|------------------|
| <b>427wt</b>       | 167             | 47                | 1546             | 1929               | 1166             |
| <b>MGA</b>         | 95              | 37                | 1592             | 2108               | 1012             |
| <b>KREN2 null</b>  | 419             | 48                | 701              | 5480               | 3288             |
| <b>KREN3 null</b>  | 118             | 21                | 586              | 4426               | 729              |
| <b>KREN1 only</b>  | 103             | 21                | 103              | 573                | 335              |
| <b>KREN2 only</b>  | 1397            | 34                | 1605             | 3392               | 7775             |
| <b>KREN3 only</b>  | 1238            | 34                | 732              | 3678               | 3521             |
| <b>Triple null</b> | 49              | 19                | 85               | 90                 | 141              |

**Table S2. Unique read sequence counts mapped to target mitochondrial transcripts by cell line.** Numbers of unique read sequences identified for target amplicons analysed by Illumina sequencing.

|             | A6 (ED) | A6 (Partial) | A6 (PRE) | COII (ED) | COII (Partial) | COII (PRE) | CYb (ED) | CYb (Partial) | CYb (PRE) | MURF2 (ED) | MURF2 (Partial) | MURF2 (PRE) | ND7 (ED) | ND7 (Partial) | ND7 (PRE) | Total Mapped |
|-------------|---------|--------------|----------|-----------|----------------|------------|----------|---------------|-----------|------------|-----------------|-------------|----------|---------------|-----------|--------------|
| 427wt       | -       | 1,955        | 64,558   | 1,567     | 956            | 201,699    | 45,099   | 42,903        | 199,120   | 132,879    | 89,365          | 78,447      | 58,582   | 50,031        | 143,492   | 1,110,653    |
| MGA         | -       | 808          | 29,176   | 496       | 323            | 106,005    | 1        | 22,198        | 120,069   | 52,265     | 61,339          | 55,644      | 26,880   | 27,756        | 82,323    | 585,283      |
| KREN2 null  | 9       | 67,091       | 153,467  | 1,055     | 1,211          | 629,411    | 2        | 32,788        | 830,505   | 9,184      | 934,361         | 132,772     | 128,889  | 237,778       | 325,672   | 3,484,195    |
| KREN3 null  | -       | 1,397        | 55,631   | 1         | 144            | 81,752     | 2,510    | 6,020         | 164,311   | 23,153     | 81,580          | 48,661      | 26,261   | 13,575        | 45,909    | 550,905      |
| KREN1 only  | -       | 43,005       | 93,155   | -         | 442            | 228,292    | 1        | 2,595         | 296,541   | 6          | 311,566         | 106,666     | 6        | 131,654       | 158,195   | 1,372,124    |
| KREN2 only  | -       | 19,291       | 114,509  | -         | 797            | 416,897    | 8,472    | 42,217        | 417,763   | 450        | 391,937         | 134,724     | 30       | 339,395       | 116,060   | 2,002,542    |
| KREN3 only  | -       | 22,555       | 118,927  | 249       | 588            | 261,983    | -        | 14,576        | 399,849   | 22,778     | 315,805         | 62,547      | 22       | 173,702       | 135,270   | 1,528,851    |
| Triple Null | -       | 7,454        | 69,660   | -         | 248            | 131,828    | -        | 1,587         | 168,587   | 1          | 1,843           | 186,287     | 4        | 16,470        | 126,288   | 710,257      |
| sum:        | 9       | 163,556      | 699,083  | 3,368     | 4,709          | 2,057,867  | 56,085   | 164,884       | 2,596,745 | 240,716    | 2,187,796       | 805,748     | 240,674  | 990,361       | 1,133,209 | 11,344,810   |

**Table S3. Read counts identified as pre-edited, partially edited, or fully edited by PARERS for each mRNA target and cell line.** Numbers of reads identified for each mRNA from each cell line after classification as pre-edited (PRE), partially edited (Partial), or fully edited (ED).

|             | INSERTION |       |      |     |      |     |     |    | DELETION    |       |       |       |     |   |
|-------------|-----------|-------|------|-----|------|-----|-----|----|-------------|-------|-------|-------|-----|---|
|             | 1U        | 2U    | 3U   | 4U  | 5U   | 6U  | 7U  | 8U | 1U          | 2U    | 3U    | 4U    | 5U  |   |
| 427wt       | 4740      | 2371  | 174  | 3   | 78   | 16  | 7   | 0  | 427wt       | 790   | 334   | 128   | 1   | 0 |
| MGA         | 6392      | 2454  | 222  | 25  | 102  | 20  | 1   | 1  | MGA         | 1125  | 386   | 183   | 0   | 0 |
| KREN2 null  | 3904      | 1429  | 159  | 29  | 228  | 42  | 9   | 2  | KREN2 null  | 1478  | 949   | 429   | 0   | 0 |
| KREN3 null  | 4677      | 1220  | 39   | 4   | 105  | 1   | 6   | 0  | KREN3 null  | 2404  | 895   | 194   | 4   | 0 |
| KREN1 only  | 192       | 7     | 1    | 0   | 46   | 0   | 2   | 0  | KREN1 only  | 6050  | 76896 | 12657 | 154 | 0 |
| KREN2 only  | 5540      | 12236 | 1003 | 98  | 108  | 38  | 45  | 0  | KREN2 only  | 599   | 15    | 4     | 0   | 0 |
| KREN3 only  | 4149      | 18049 | 4115 | 266 | 354  | 165 | 57  | 29 | KREN3 only  | 331   | 23    | 2     | 0   | 0 |
| Triple null | 763       | 59    | 2    | 2   | 51   | 5   | 4   | 0  | Triple null | 24612 | 1354  | 191   | 9   | 0 |
|             | 30358     | 37825 | 5715 | 426 | 1072 | 288 | 132 | 33 |             | 37389 | 80851 | 13789 | 168 | 0 |

**Table S4. Normalized read counts (reads per million reads) identified within reads that contained a single edited site.** Data for Figure 5 in tabular form, showing read numbers normalized to the total number of reads for each cell line (Column 6 in Table S1). Columns show the number of Us either deleted or inserted at a single editing site.





| Oligo Name                                               | Oligo Sequence                                               |
|----------------------------------------------------------|--------------------------------------------------------------|
| <i>Oligos for knockout constructs</i>                    |                                                              |
| KREN1 FOR long A                                         | GAAACGGTTACCAGCGACG                                          |
| KREN1 REV long H                                         | TTGCTGAAGCACGCAAATTTTC                                       |
| KREN1 FOR nested A                                       | CTCACAAGGAATTGGATA                                           |
| KREN1 FOR nested H                                       | CGCAAAGATAAGTGACATATG                                        |
| KREN1 REV B                                              | ATACGAAGTTATAAGCTTATCAATGCTTTTTACTCCTTTTC                    |
| KREN1 FOR C                                              | ACCATGGTGTGCTTAATTAC                                         |
| KREN1 REV D                                              | ATACGAAGTTATAAGCTTATCCTACCTTTAGCCACTTAGCAA                   |
| KREN1 FOR E                                              | TTATGGATCCTAAGTGGGTCTAATTATTTGGATGATGAGGT                    |
| KREN1 REV F                                              | TGTACATGAGTGGAGGACATTG                                       |
| KREN1 FOR G                                              | TTATGGATCCTAAGTGGGTCCAAGGATGGGAATATGCAT                      |
| KREN2 FOR long A                                         | TCTGGTGGAAATAGAGAAG                                          |
| KREN2 REV long H                                         | TTGTAGAGCTGAGACGCT                                           |
| KREN2 FOR nested A                                       | TCCTCTTCTTCTTACTCAC                                          |
| KREN2 FOR nested H                                       | AATACCAAATTTAAGAAACG                                         |
| KREN2 REV B                                              | ATACGAAGTTATAAGCTTATCGAAGTTCGTGGTTCCTTGC                     |
| KREN2 FOR C                                              | AGTGTTCACTTACCTCCCA                                          |
| KREN2 REV D                                              | ATACGAAGTTATAAGCTTATCATGGTAATGCCTTACTTCAA                    |
| KREN2 FOR E                                              | TTATGGATCCTAAGTGGGTCTGATTACATTCCTACTTTC                      |
| KREN2 REV F                                              | CACATGAACATAAAGAAGAA                                         |
| KREN2 FOR G                                              | TTATGGATCCTAAGTGGGTCCACCGGGTGTGCATCCAT                       |
| KREN3 FOR long A                                         | GGTAGTAGCAAACAATTGTGC                                        |
| KREN3 REV long H                                         | ATACGACAAGAAGTCTTGCTA                                        |
| KREN3 FOR nested A                                       | TTGTGGTCTTTTTCCCATCT                                         |
| KREN3 FOR nested H                                       | CATGATAGGAAAAGTAACAA                                         |
| KREN3 REV B                                              | ATACGAAGTTATAAGCTTATCGAGGTATAAAGCAACTAGGGAG                  |
| KREN3 FOR C                                              | CCTGCGGCACTACGACTAC                                          |
| KREN3 REV D                                              | ATACGAAGTTATAAGCTTATCTTGGCGAATTTACAAAGCT                     |
| KREN3 FOR E                                              | TTATGGATCCTAAGTGGGTCTCGTCATTGGAGGTTTGC                       |
| KREN3 REV F                                              | TGACAAAACGTGCGGAGC                                           |
| KREN3 FOR G                                              | TTATGGATCCTAAGTGGGTCCGCATAGGTGGTTATGGCG                      |
| <i>Oligos for First Round RT-PCR for RNAseq analysis</i> |                                                              |
| 11209 ND7-5' FOR                                         | GTCTCGTGGGCTCGGAGATGTGTATAAGAGACAGATGACTACATGATAAGTA         |
| 11210 ND7-5' REV                                         | TCGTCGGCAGCGTCAGATGTGTATAAGAGACAGACTTTTCTGTACCACGATGC        |
| 11215 MURF2 FOR                                          | GTCTCGTGGGCTCGGAGATGTGTATAAGAGACAGATAGAAAGGTATATAATCTATAATG  |
| 11216 MURF2 REV                                          | TCGTCGGCAGCGTCAGATGTGTATAAGAGACAGCATAACAAATCAAAAACACGAC      |
| 11217 A6 FOR                                             | GTCTCGTGGGCTCGGAGATGTGTATAAGAGACAGAGAGCAGGAAAGGTTAG          |
| 11218 A6 REV                                             | TCGTCGGCAGCGTCAGATGTGTATAAGAGACAGTTTGTATCTTATTCTATAACTCC     |
| 11211 CYb FOR                                            | GTCTCGTGGGCTCGGAGATGTGTATAAGAGACAGGTTAAGAATAATGGTTATAAATT    |
| 11212 CYb REV                                            | TCGTCGGCAGCGTCAGATGTGTATAAGAGACAGCAACCTGACATTAAGAC           |
| 11213 COII FOR                                           | GTCTCGTGGGCTCGGAGATGTGTATAAGAGACAGATTACAGTGAACCATGTATTGACATT |

Oligos for Second Round PCR for RNAseq  
analysis

|                              |                                                     |
|------------------------------|-----------------------------------------------------|
| P5-TAGATCGC-F1 (427wt)       | AATGATACGGCGACCACCGAGATCTACACTAGATCGCTCGTCGGCAGCGTC |
| P5-CTCTCTAT-F2 (MGA)         | AATGATACGGCGACCACCGAGATCTACACCTCTCTATTCGTCGGCAGCGTC |
| P5-TATCCTCT-F3 (N2null)      | AATGATACGGCGACCACCGAGATCTACACTATCCTCTTCGTCGGCAGCGTC |
| P5-AGAGTAGA-F4 (N3null)      | AATGATACGGCGACCACCGAGATCTACACAGAGTAGATCGTCGGCAGCGTC |
| P5-GTAAGGAG-F5 (N1only)      | AATGATACGGCGACCACCGAGATCTACACGTAAGGAGTCGTCGGCAGCGTC |
| P5-ACTGCATA-F6 (N2only)      | AATGATACGGCGACCACCGAGATCTACACACTGCATATCGTCGGCAGCGTC |
| P5-AAGGAGTA-F7 (N3only)      | AATGATACGGCGACCACCGAGATCTACACAAGGAGTATCGTCGGCAGCGTC |
| P5-CTAAGCCT-F8 (Triple null) | AATGATACGGCGACCACCGAGATCTACACCTAAGCCTTCGTCGGCAGCGTC |
|                              |                                                     |
| P7-TCGCCTTA-R1 (427wt)       | CAAGCAGAAGACGGCATAACGAGATTCGCCTTAGTCTCGTGGGCTCGG    |
| P7-CTAGTACG-R2 (MGA)         | CAAGCAGAAGACGGCATAACGAGATCTAGTACGGTCTCGTGGGCTCGG    |
| P7-TTCTGCCT-R3 (N2null)      | CAAGCAGAAGACGGCATAACGAGATTTCTGCCTGTCTCGTGGGCTCGG    |
| P7-GCTCAGGA-R4 (N3null)      | CAAGCAGAAGACGGCATAACGAGATGCTCAGGAGTCTCGTGGGCTCGG    |
| P7-AGGAGTCC-R5 (N1only)      | CAAGCAGAAGACGGCATAACGAGATAGGAGTCCGTCTCGTGGGCTCGG    |
| P7-CATGCCTA-R6 (N2only)      | CAAGCAGAAGACGGCATAACGAGATCATGCCTAGTCTCGTGGGCTCGG    |
| P7-GTAGAGAG-R7 (N3only)      | CAAGCAGAAGACGGCATAACGAGATGTAGAGAGTCTCGTGGGCTCGG     |
| P7-CCTCTCTG-R8 (Triple null) | CAAGCAGAAGACGGCATAACGAGATCCTCTCTGGTCTCGTGGGCTCGG    |

Table S7. Oligo sequences used in this study.

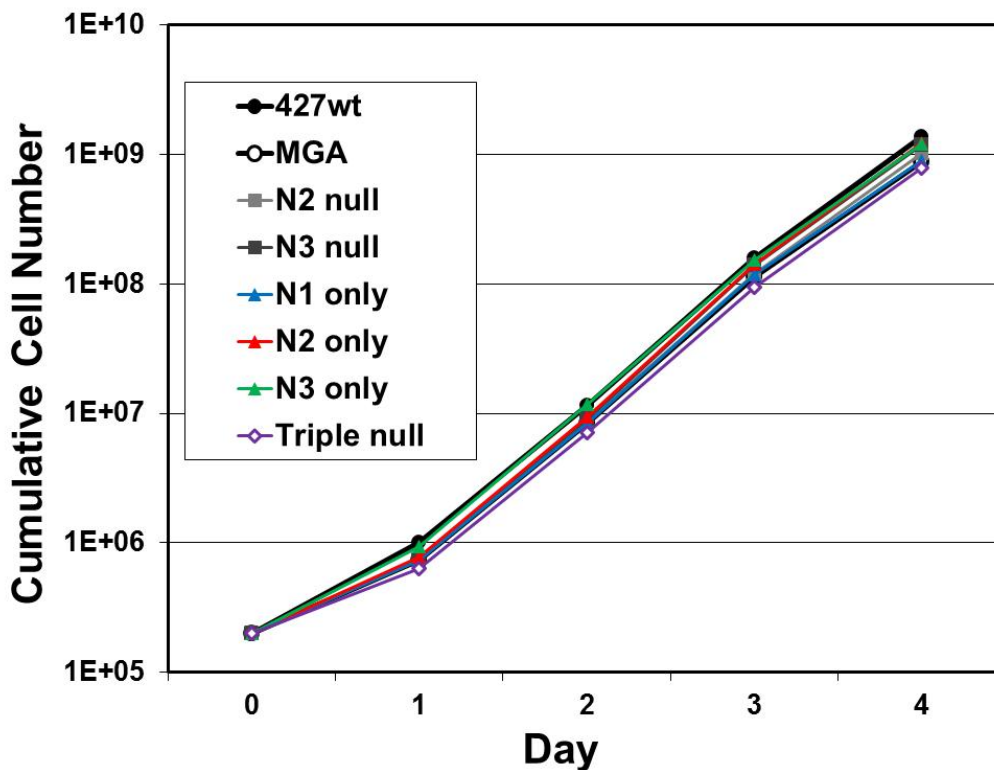

Figure S1. Cumulative growth curves of cell lines used in this study. No notable differences in growth among cell lines were observed.

# 427wt

## MURF2

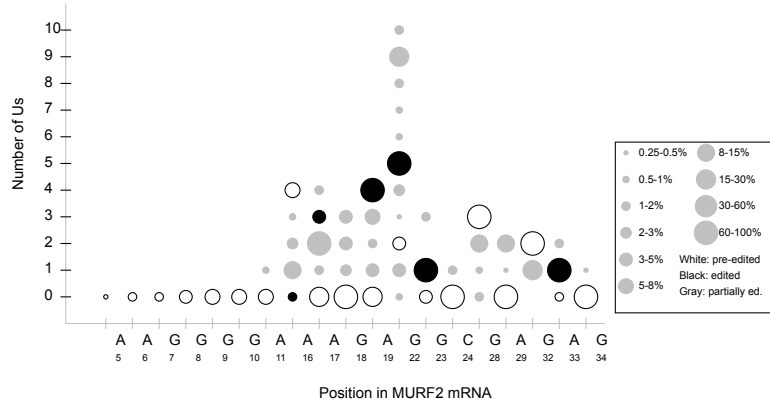

## ND7

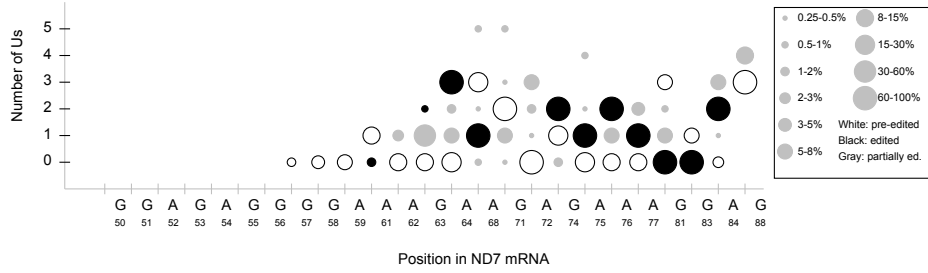

## A6

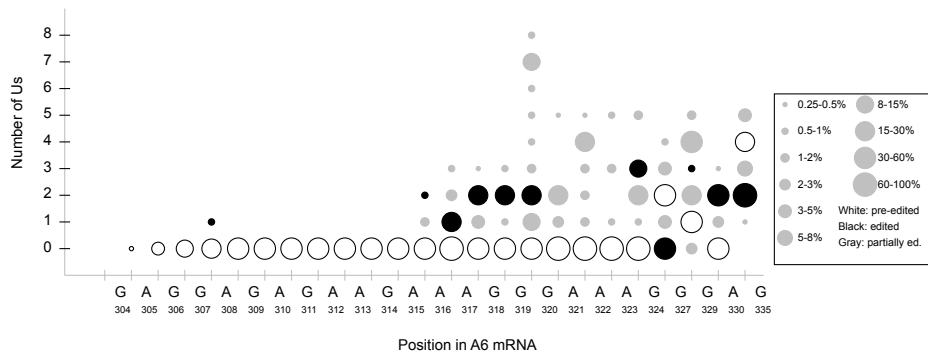

## CYb

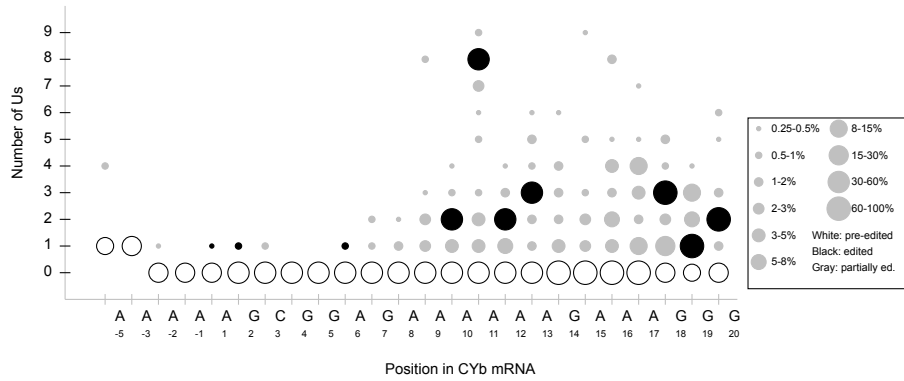

## COII

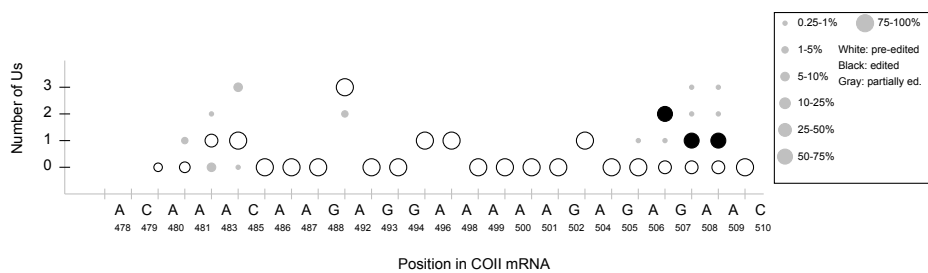

# MGA

MURF2

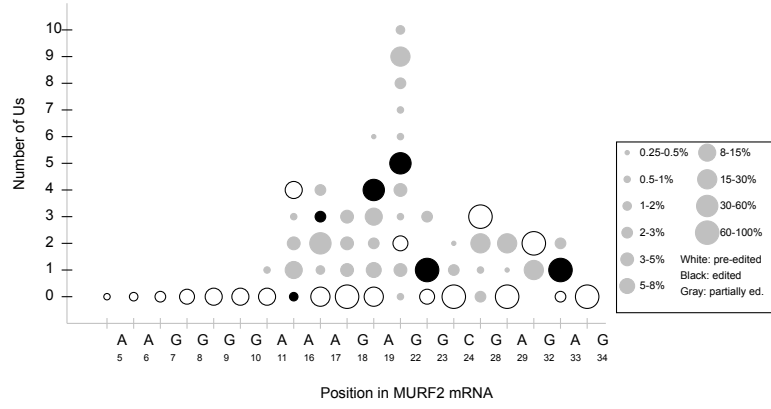

ND7

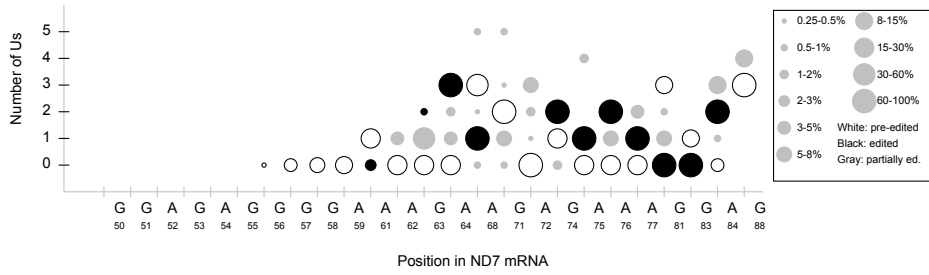

A6

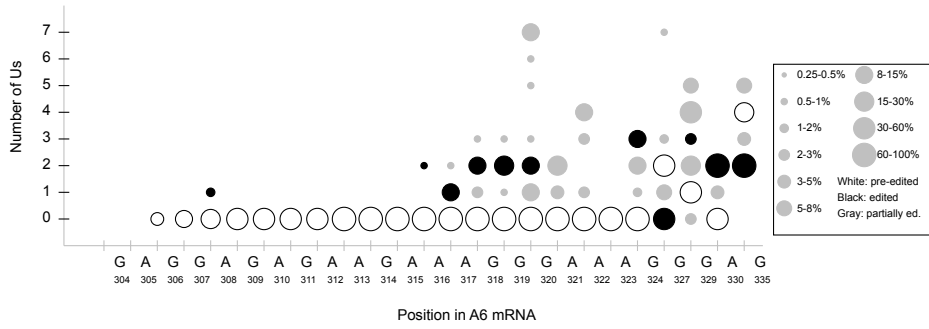

CYb

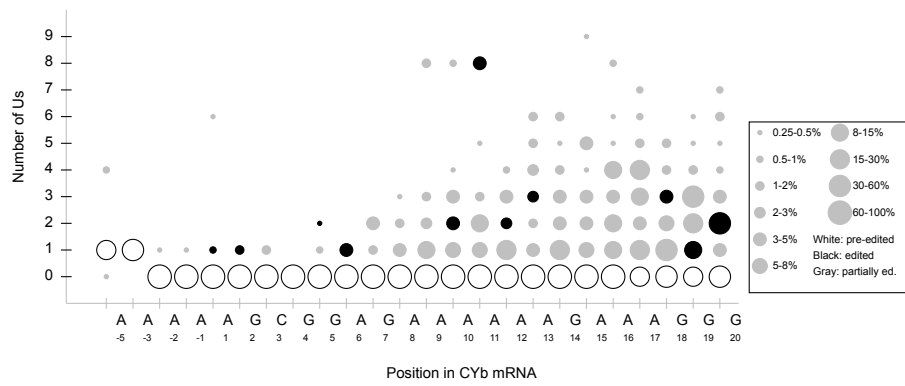

COII

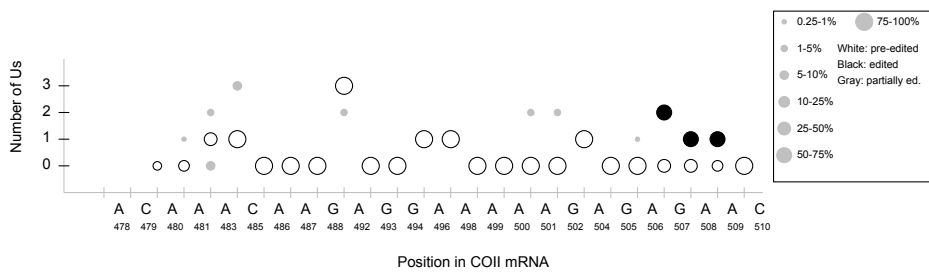



# KREN2 null

MURF2

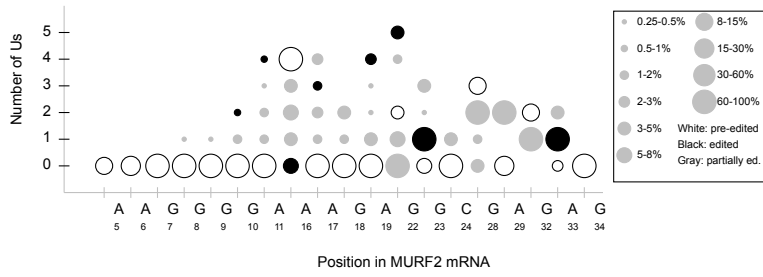

ND7

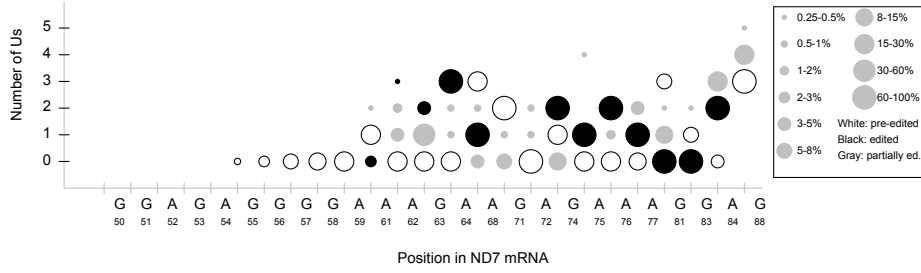

A6

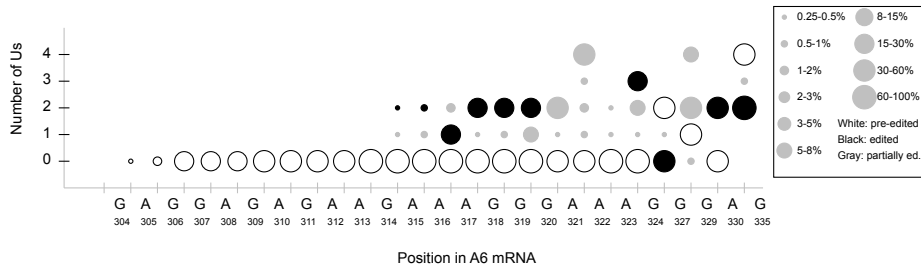

CYb

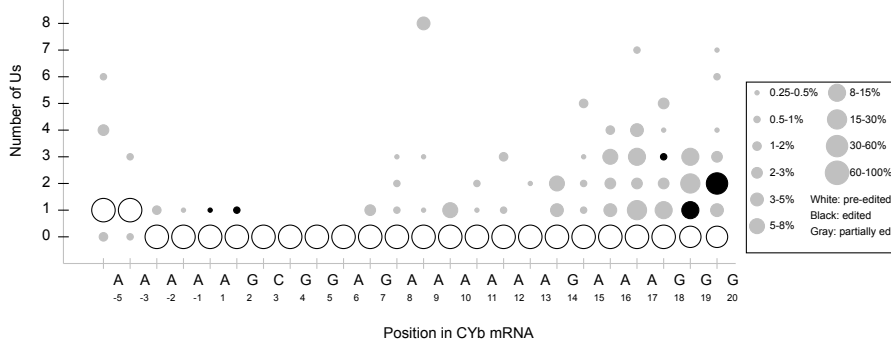

COII

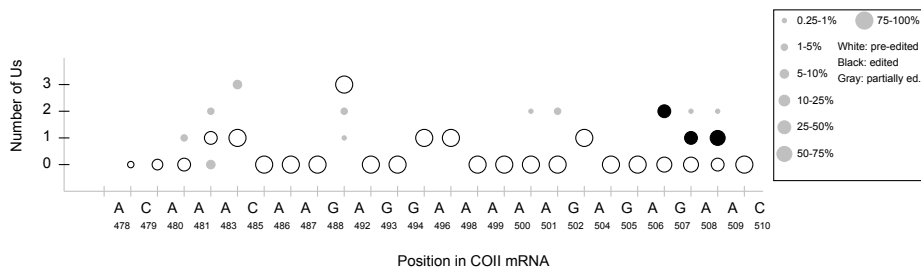

# KREN3 null

MURF2

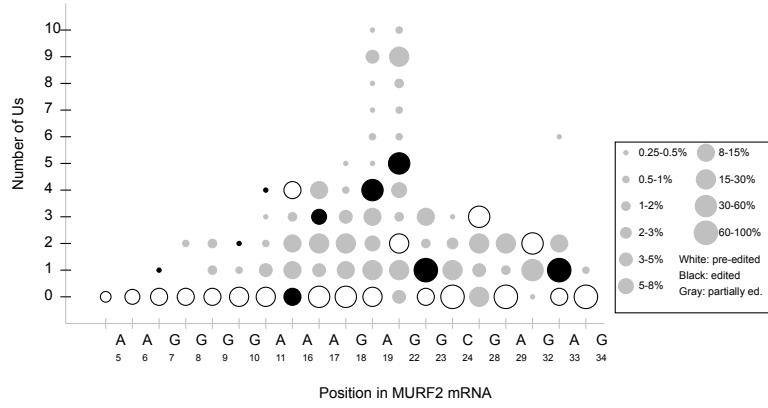

ND7

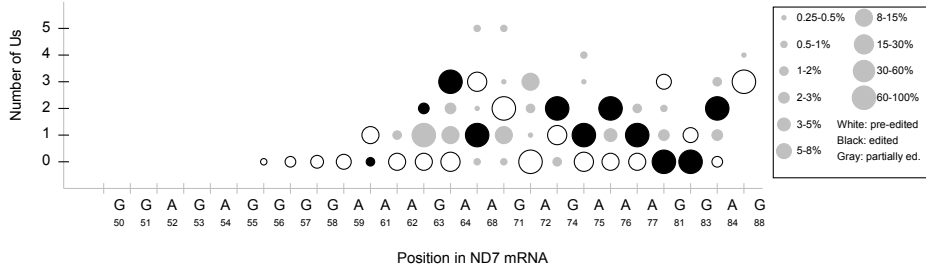

A6

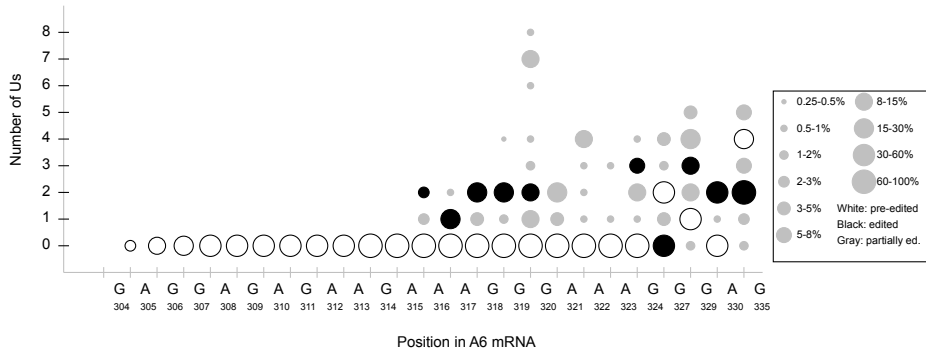

CYb

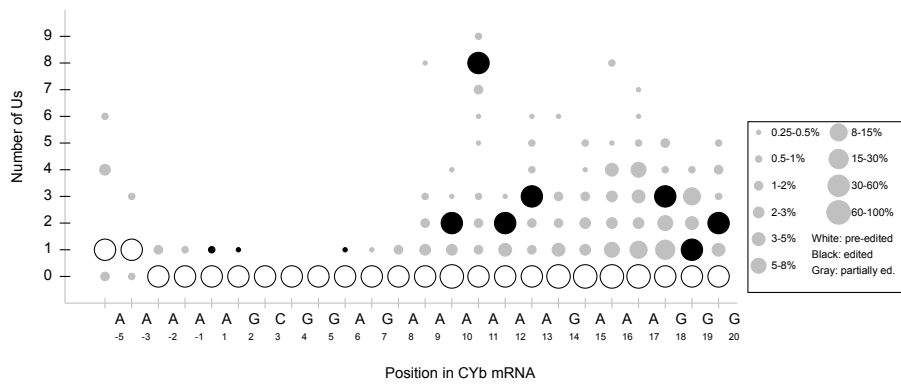

COII

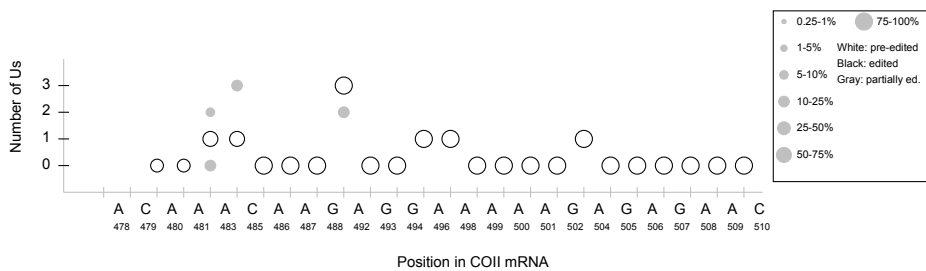

# KREN1 only

MURF2

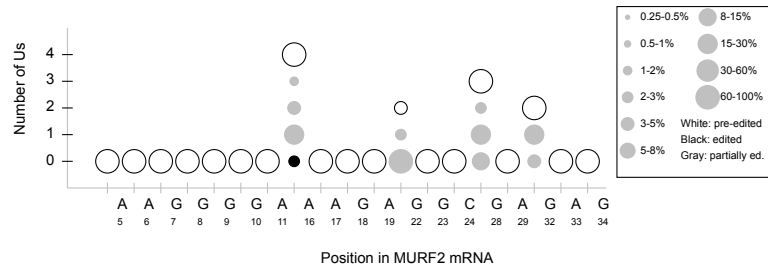

ND7

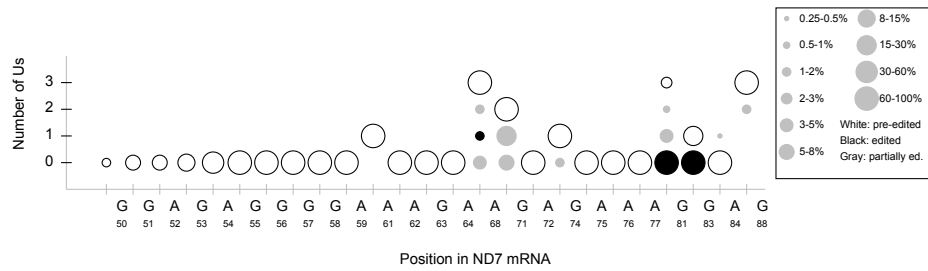

A6

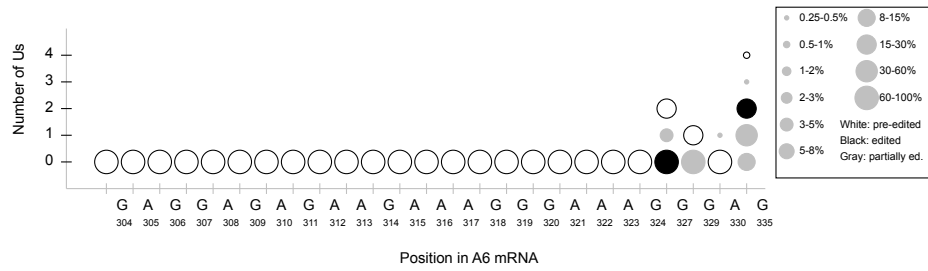

CYb

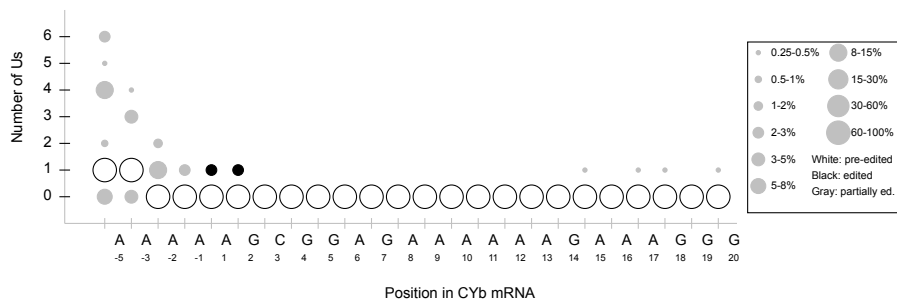

COII

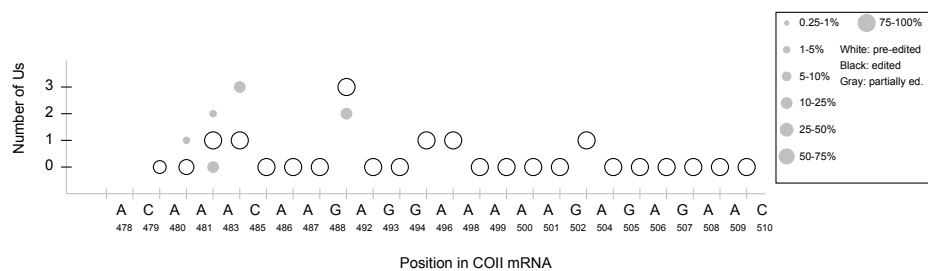

# KREN2 only

MURF2

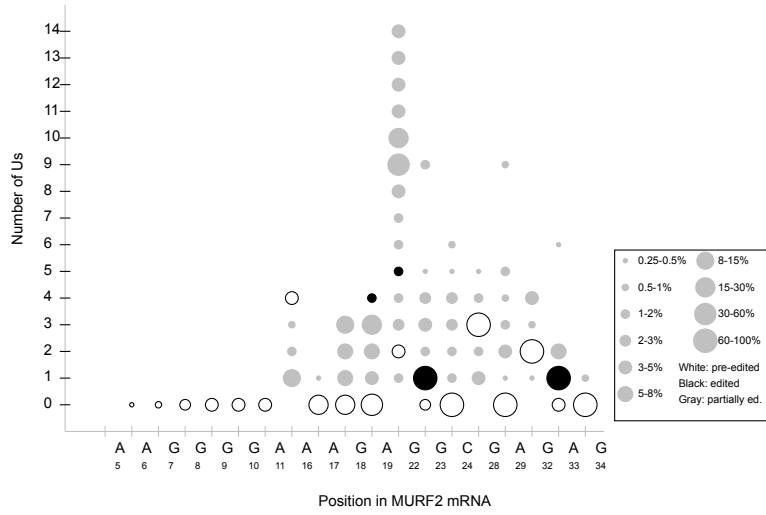

ND7

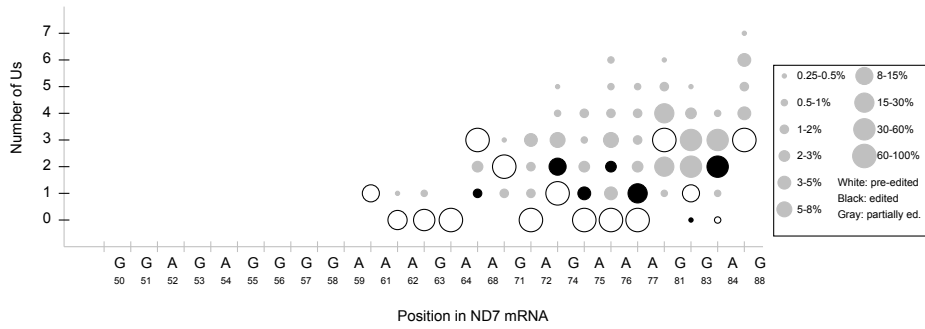

A6

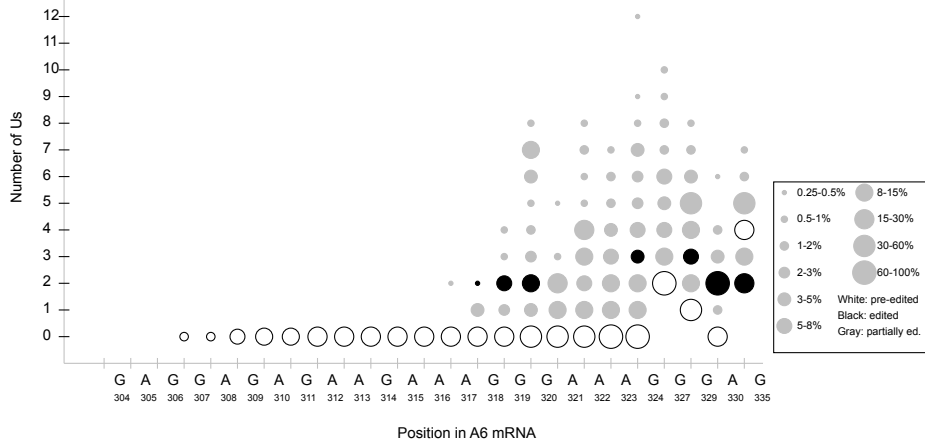

CYb

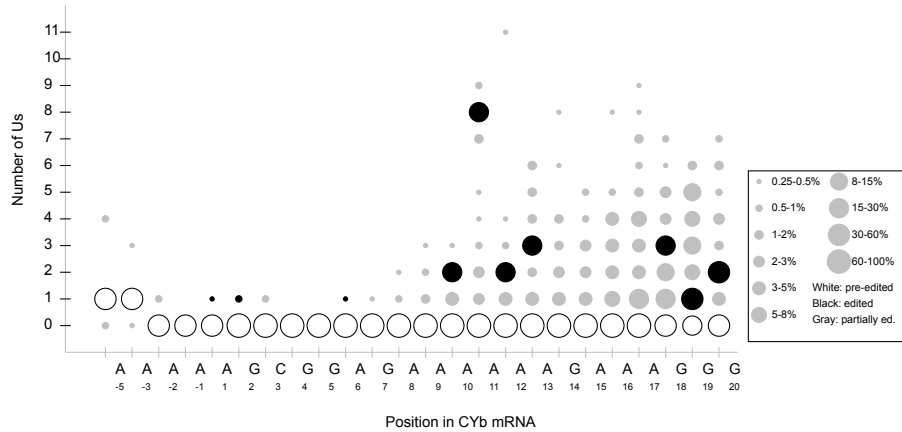

COII

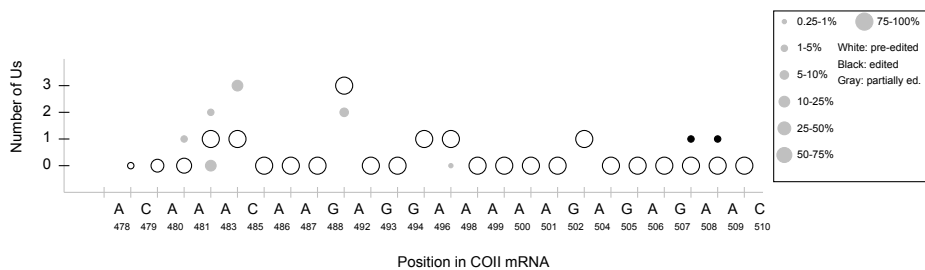

# KREN3 only

MURF2

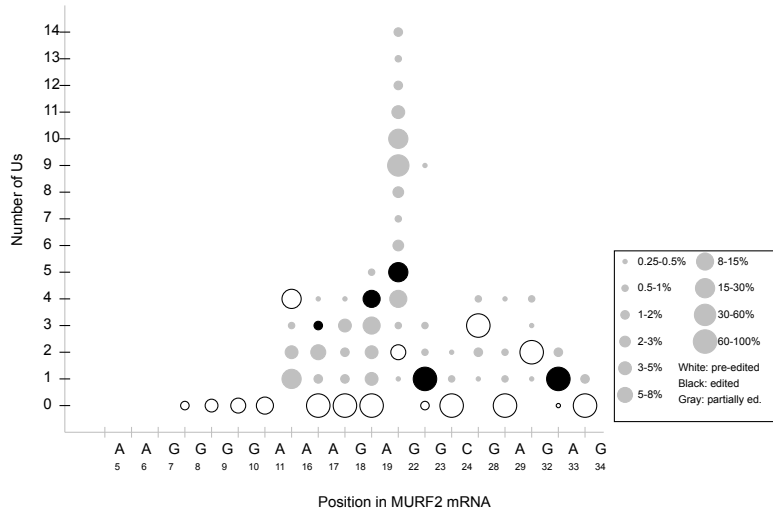

ND7

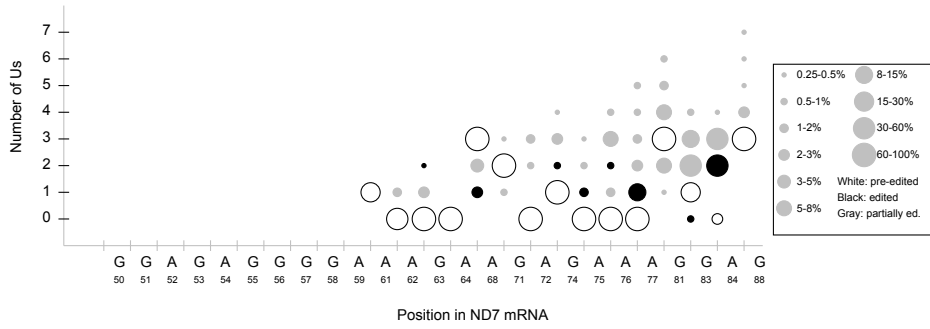

A6

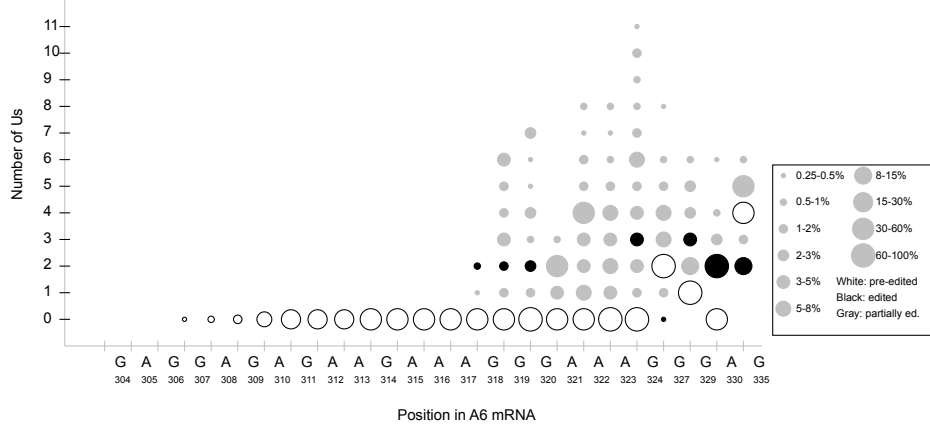

CYb

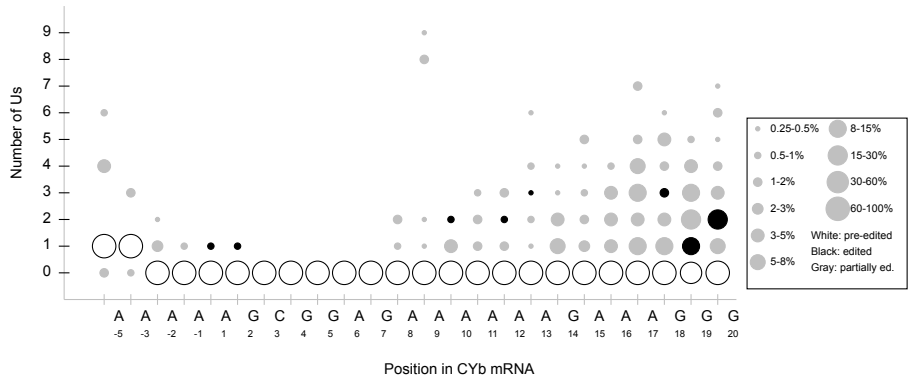

COII

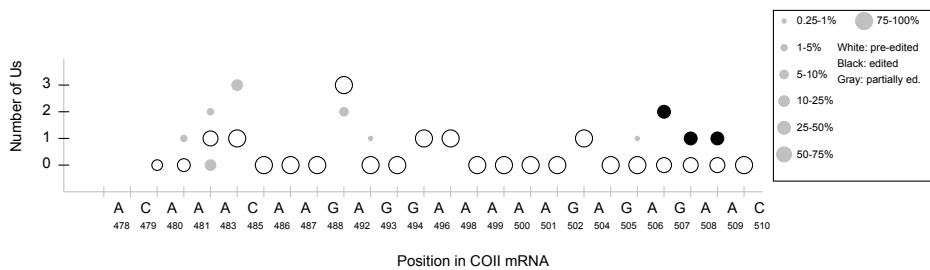

# Triple null

MURF2

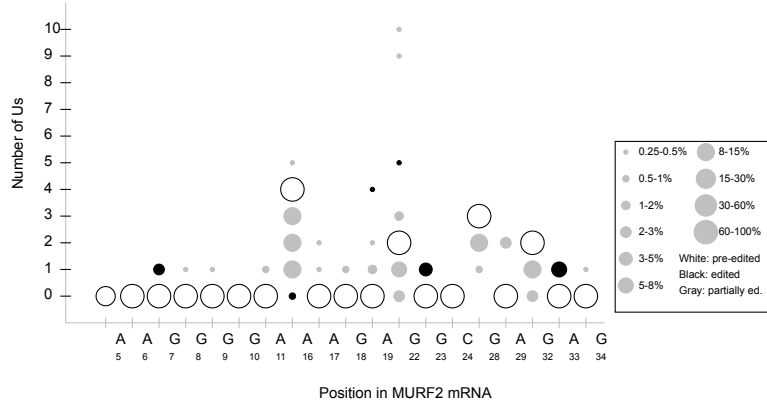

ND7

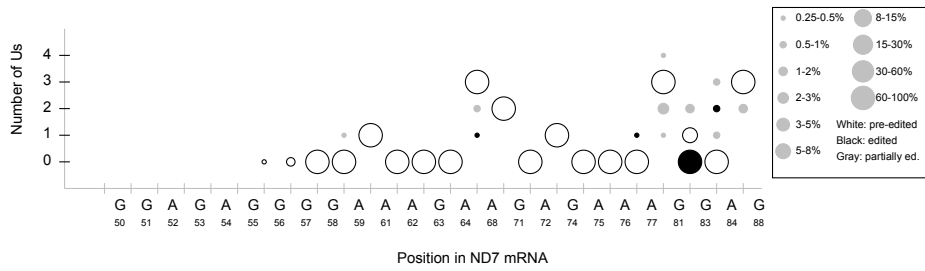

A6

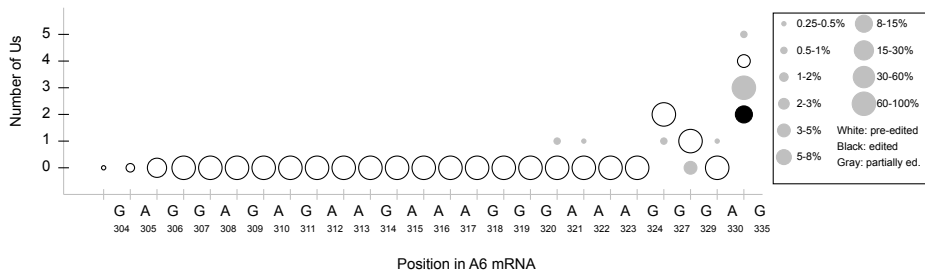

CYb

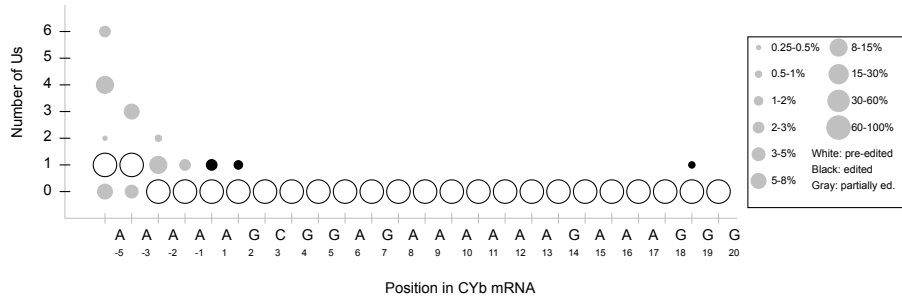

COII

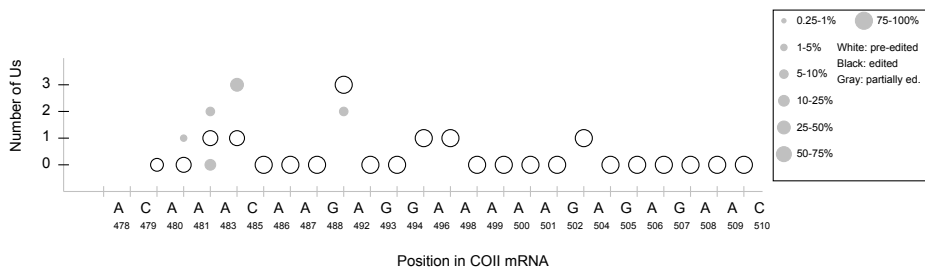

**Figure S2. Bubble plot analyses of edited read sequences show the frequency of site-specific insertion and deletion activities.** Bubble plots show number of Us inserted at potential editing sites at the 3' end of indicated transcripts for each cell line. In comparison to Figures 7-11, these plots include all of the sites in the dataset, not just the first 10 sites at the 3' end of the sequence. All mapped reads for each transcript are analyzed to determine the amount (number of Us, y-axis) and position (location within 3' end of edited region, x-axis) of editing events within each cell line. The x-axis shows the mRNA position using the non-U nucleotide sequence, with position numbering starting at the first base of the start codon in the pre-edited sequence. When the number of Us at a position matches the pre-edited number of Us, the bubble is white; when the number of Us is altered by editing, the number of Us matching a fully edited mRNA is colored black. When the number of Us at a position matches neither pre-edited nor fully edited sequence, bubbles are colored grey to denote partial editing. The size of the bubble correlates with the proportion of reads that have that number of Us at each position, with the legend giving the percent range for each size bubble. To decrease noise in these plots, data points that represent less than 0.25% of reads or fewer than 5 reads total are not shown.
